# Supplementary material for: Structural and tribometric characterization of biomimetically inspired synthetic "insect adhesives"
Source: publisher site journal article supplement (doi:10.3762/bjnano.8.6), 2017-01-06
Supplement: Additional file 1 [file 2190-4286-8-6-S1.pdf]

# **Supporting Information**

**for**

## **Structural and tribometric characterization of biomimetically inspired synthetic "insect adhesives"**

Matthias W. Speidel<sup>1</sup>, Malte Kleemeier<sup>2</sup>, Andreas Hartwig<sup>2,3</sup>, Klaus Rischka<sup>2</sup>, Angelika Ellermann<sup>4</sup>,  
Rolf Daniels<sup>4</sup> and Oliver Betz<sup>1\*</sup>

Address: <sup>1</sup>Institut für Evolution und Ökologie, Universität Tübingen, Auf der Morgenstelle 28, D-72076 Tübingen, Germany, <sup>2</sup>Fraunhofer-Institut für Fertigungstechnik und Angewandte Materialforschung, Wiener Str. 12, D-28359 Bremen, Germany, <sup>3</sup>Universität Bremen, Fachbereich 2 Biologie/Chemie, Leobener Str., 28359 Bremen, Germany and <sup>4</sup>Pharmazeutisches Institut, Universität Tübingen, Pharmazeutische Technologie und Biopharmazie, Auf der Morgenstelle 8, D-72076 Tübingen, Germany

Email: Oliver Betz - [oliver.betz@uni-tuebingen.de](mailto:oliver.betz@uni-tuebingen.de)

\* Corresponding author

## **Additional figures and tables**

# 1. Figures

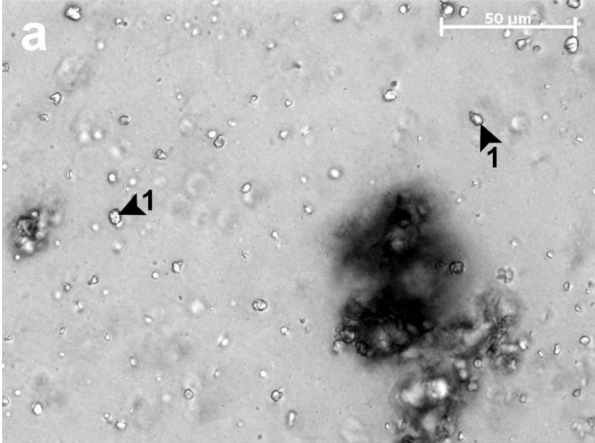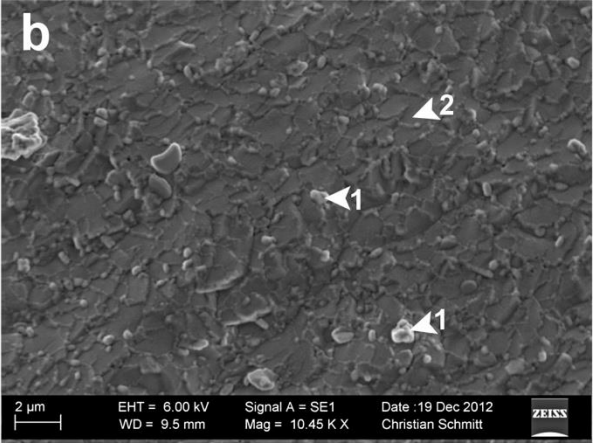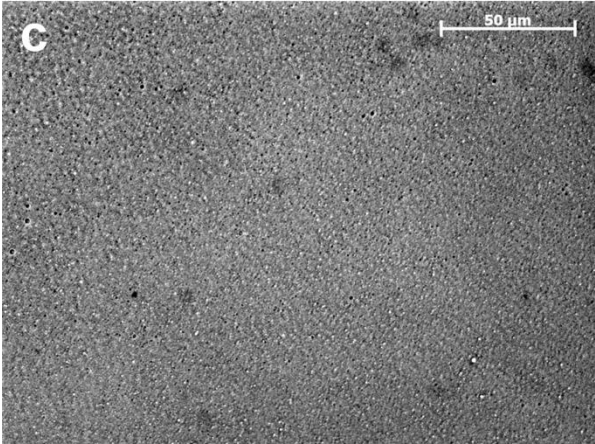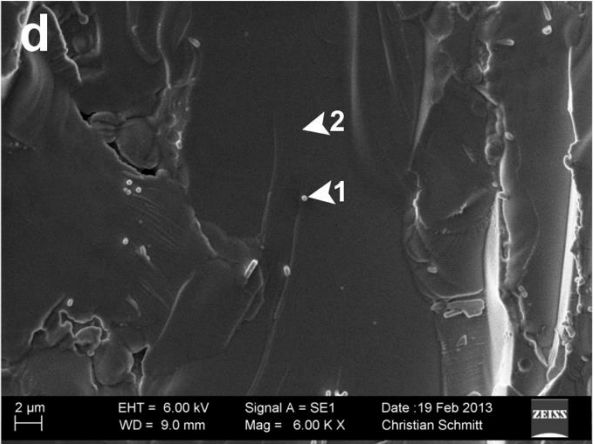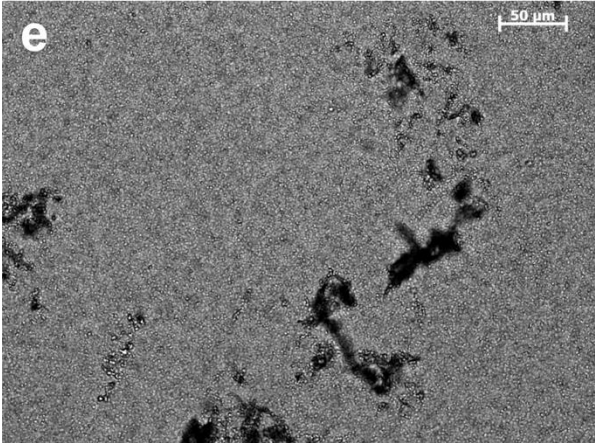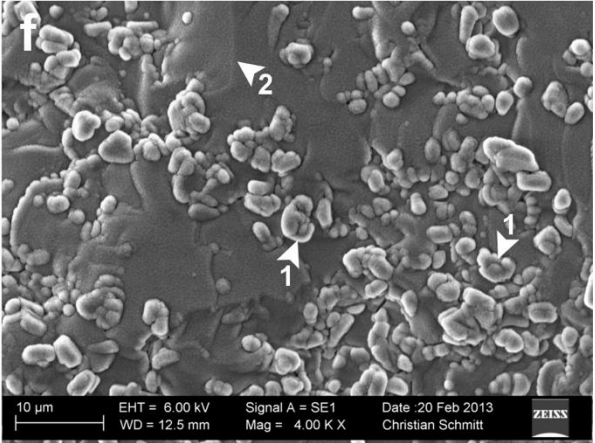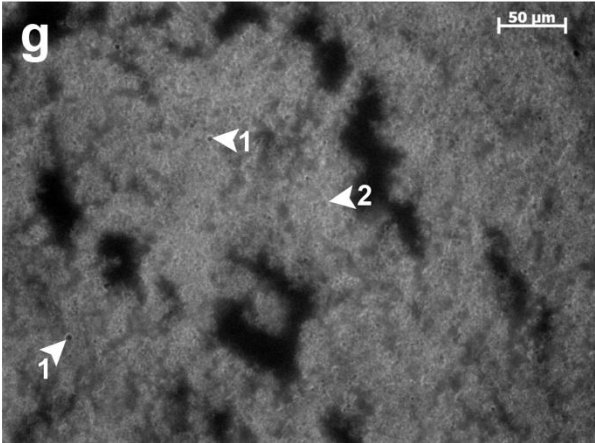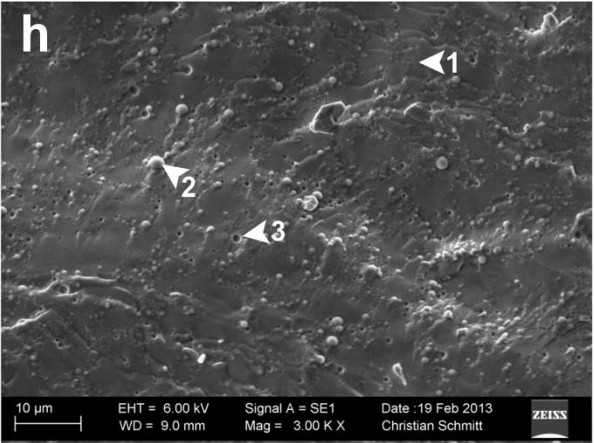

**Figure S1:** Droplet distribution of selected emulsions of the first and second generation. Left side: appearance of the emulsions by bright field light or fluorescence microscopy; right side: appearance of the emulsions by cryo-SEM. (a) Loosely scattered and polyhedral droplets (1) of the emulsion OG2 by light microscopy. The emulsion was examined after dilution with water under bright field. The lipid phase octacosane consisted of solid polyhedral fragments causing aggregation. (b) Polyhedral fragments (1) of the emulsion OG2 embedded in outer phase (2) of flocculent structure. Main size range of fragments about 1 - 2  $\mu\text{m}$ . (c) Extremely dense distribution of tiny droplets of the protein-free emulsion SW2 (mainly black appearance) by light microscopy. Many droplets below microscopic resolution. (d) Widely scattered droplets (1) of the emulsion SW2 embedded in the outer phase (2) of smooth appearance. Main size range of droplets about  $<1 \mu\text{m}$ . (e) Extremely dense distribution of tiny droplets of the protein-free emulsion OW2 by light microscopy. Many droplets below microscopic resolution. The emulsion was examined after dilution with water under bright field. (f) Aggregated polyhedral fragments (1) of emulsion OW2 embedded in a smooth outer phase (2). Main size range of fragments about  $<1 - 5 \mu\text{m}$ . (g) Non-fluorescent droplets (1) of emulsion SG4 embedded in fluorescent outer phase (2) (the Sudan-III-stained emulsion was examined under light excitation of 530 – 560 nm) after dilution with squalane. The non-fluorescent droplets in combination with the fluorescent outer phase are indicative of a w/o emulsion. (h) Smooth emulsion surface (1) of SG4 consisting of both droplets (2) and cavities (3). The cavities ( $<1 - 2 \mu\text{m}$ ) seem to be remains of water droplets that evaporated during the sublimation step, whereas the unaffected droplets probably represent droplets that have not fully evaporated. Main size range of visible droplets about  $<1 - 2 \mu\text{m}$ .

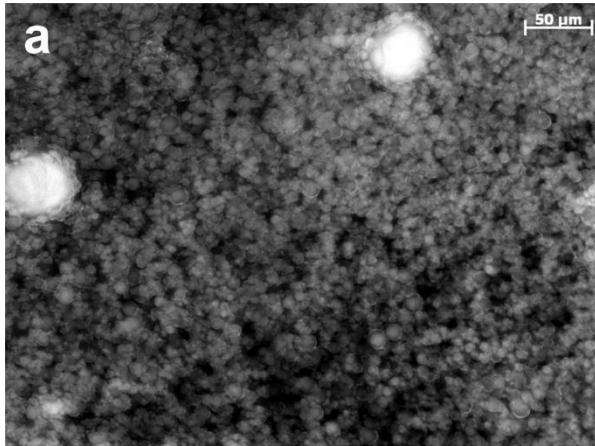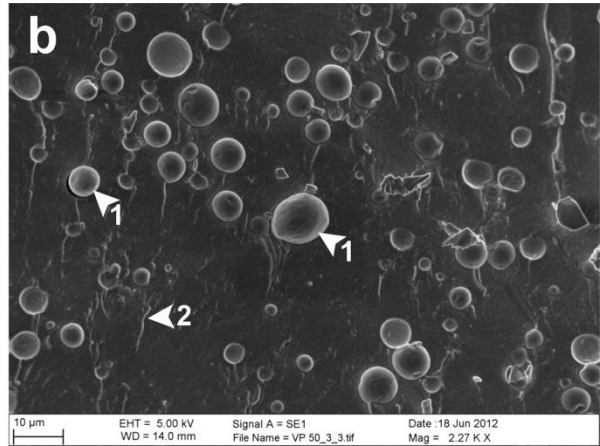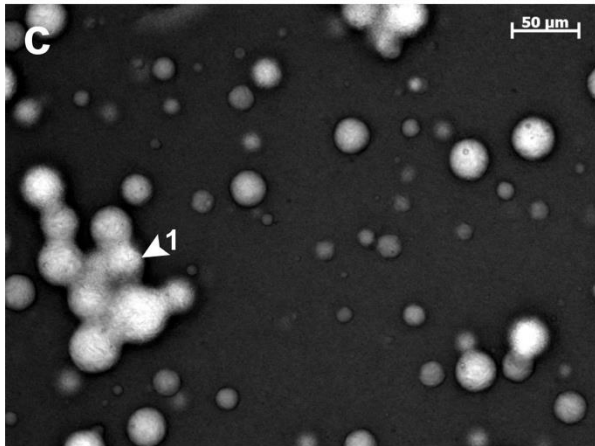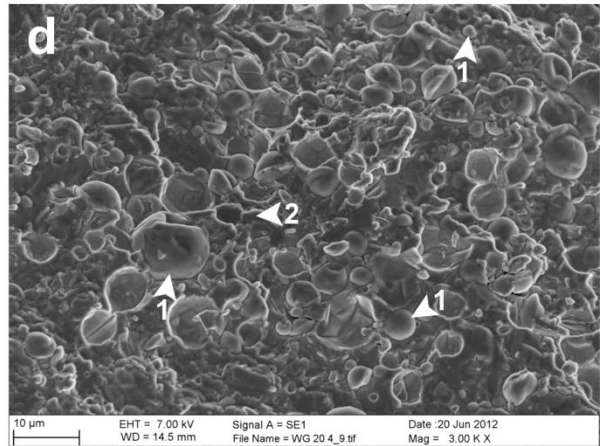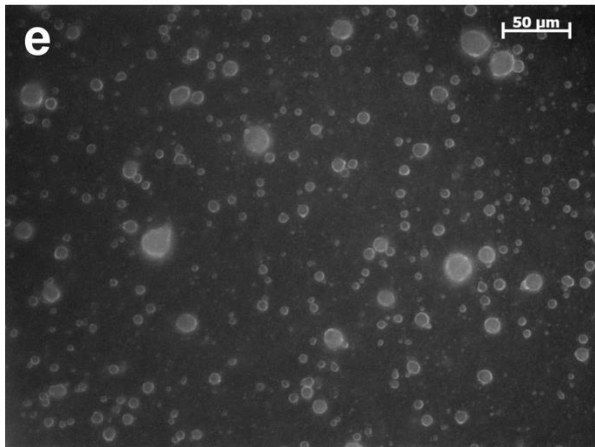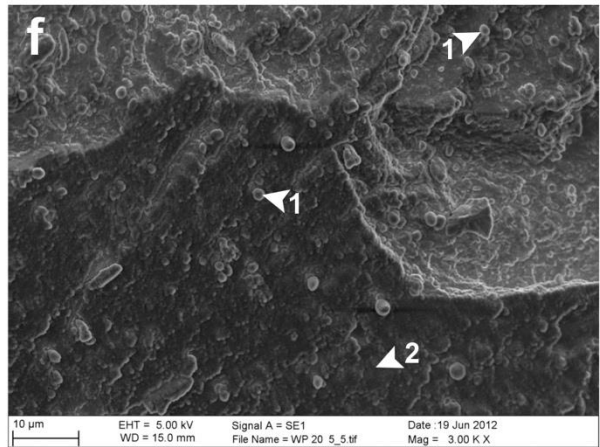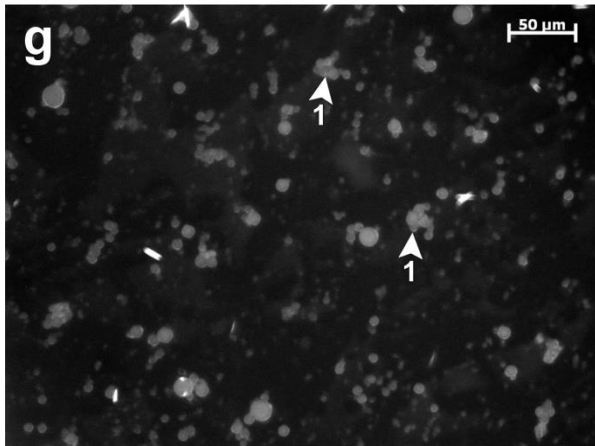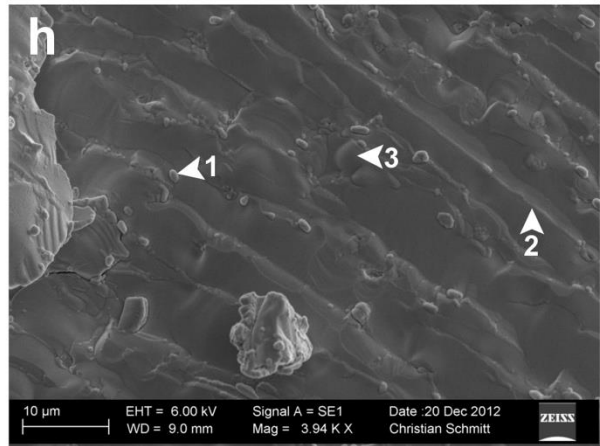

**Figure S2:** Droplet distribution of selected emulsions of the first and second generation. Left side: appearance of the emulsions by bright field light or fluorescence microscopy; right side: appearance of the emulsions by cryo-SEM. (a) Densely distributed fluorescent lipid droplets of emulsion VP50 (Sudan-III-stained emulsion was examined under light excitation of 300 - 400 nm). The fluorescent droplets are indicative of the o/w characteristic of this emulsion, because these fluorescent oily droplets form the inner phase. The outer hydrophilic phase is reduced because of evaporation. (b) Homogeneously distributed droplets (arrow 1) of emulsion VP50 embedded in an outer phase (2) with a slightly rough appearance. The emulsion contained a droplet size in the range of about  $<1 - 20 \mu\text{m}$ , but the size of most of the droplets lies between  $2 - 10 \mu\text{m}$ . (c) Loosely scattered droplets of the emulsion WG20 by light microscopy. Sporadic aggregation of droplets to larger fragments (1). (d) Distributed droplets (1) of emulsion WG20 embedded in an outer phase (2) with a rough and chiselled appearance. Main size range of irregularly shaped droplets about  $4 - 10 \mu\text{m}$ . (e) Homogeneously distributed fluorescent lipid droplets of emulsion WP20 (Sudan-III-stained emulsion was examined under light excitation of  $530 - 560 \text{ nm}$ ) after dilution with water. The fluorescent droplets are indicative of the o/w characteristic of the emulsion WP20, because these fluorescent oily droplets form the inner phase. (f) Densely distributed droplets (1) of emulsion WP20 embedded in an outer phase (2) of a rough appearance. Main size range of round- to oval-shaped droplets about  $1 - 10 \mu\text{m}$ . (g) Fluorescent droplets of emulsion SA2 embedded in a non-fluorescent outer phase (the Sudan-III-stained emulsion was examined under light excitation of  $530 - 560 \text{ nm}$ ). The fluorescent droplets in combination with the non-fluorescent outer phase are indicative of a o/w emulsion. Frequent occurrence of aggregated droplets (1). (h) Widely scattered droplets (1) of emulsion SA2 embedded in the outer phase (2) of a smooth appearance and a lamellar-like structure. Round bulges (3) of the surface might indicate hidden large droplets under a layer of the outer phase. Main size range of droplets about  $<1 - 2 \mu\text{m}$ .

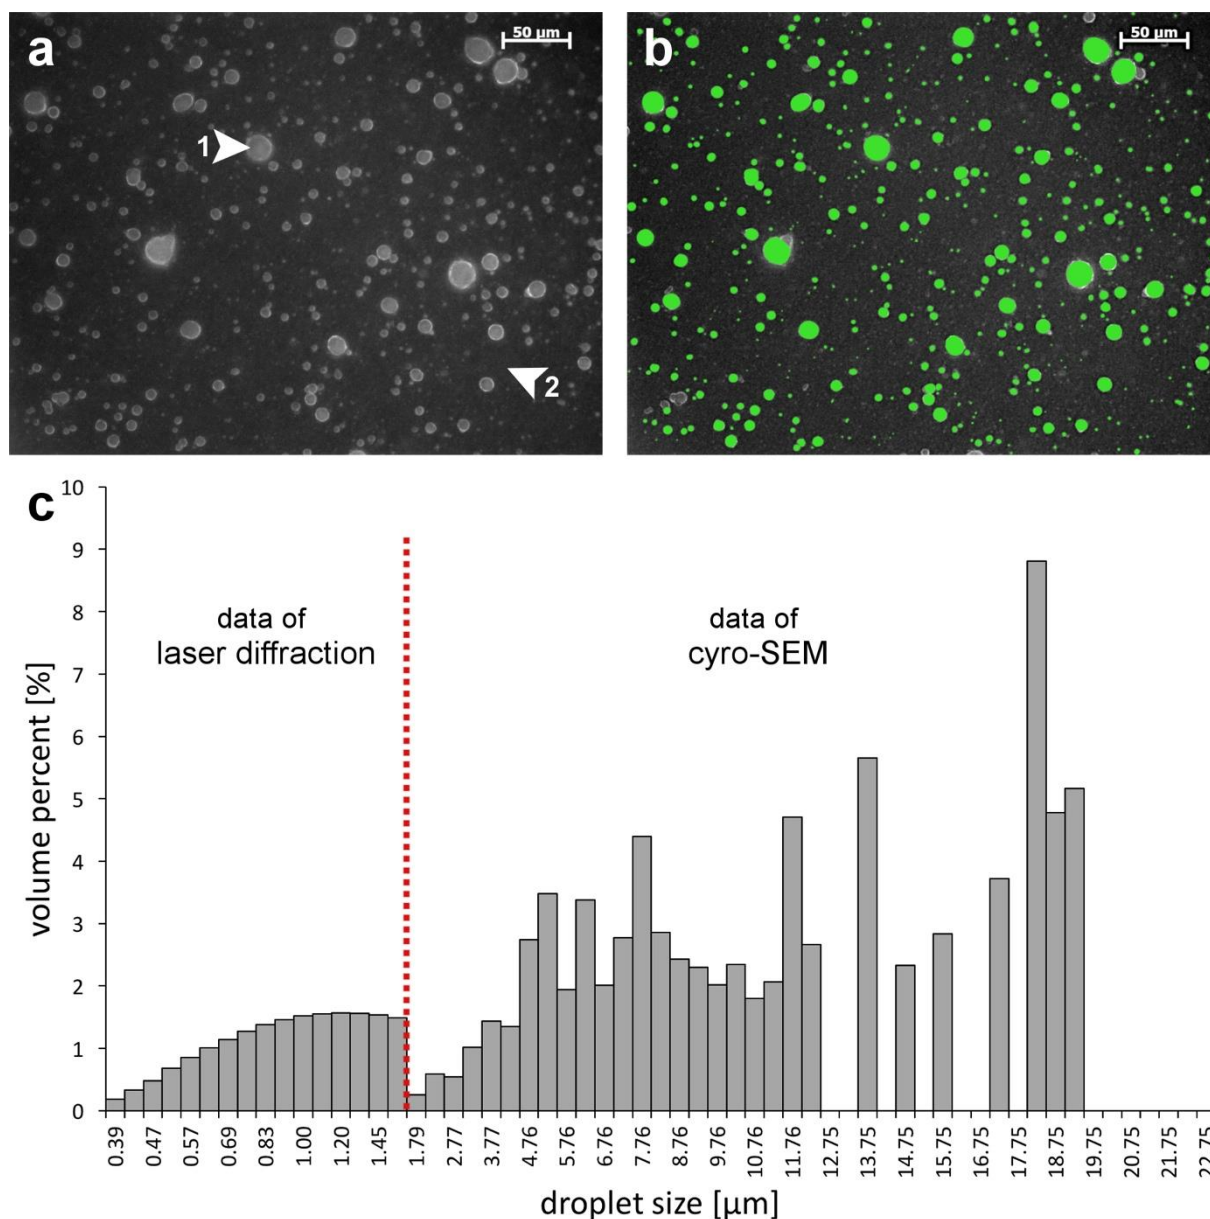

**Figure S3:** Exemplified droplet-size distribution of the first generation emulsion WP20 (o/w) as established by microscopical analysis. (a) Raw fluorescence image. The lipid phase was amplified by Sudan III to maintain fluorescence. Arrow 1 shows fluorescent lipophilic droplets, whereas arrow 2 shows the non-fluorescent hydrophilic phase. (b) Further preparation of fluorescence image for the droplet-size distribution analysis. All clearly visible droplets were coloured in an intense green by using Adobe® Photoshop® CS4 11.0. (c) Histogram showing the volume percentage of the various droplet sizes. Droplet-sizes of  $> 1.5 \mu\text{m}$  were semi-automatically determined by the image processing software ImageJ (W. Rasband, version 1.47n), whereas droplet sizes of  $0 - 1.5 \mu\text{m}$  were identified by laser diffraction. The droplet sizes were transformed into volume percentage by equation (2). Emulsion WP20 is characterized by a wide droplet-size distribution ranging from extremely small to large droplets.

## 2. Tables

**Table S1:** Detailed emulsion characteristics as determined by direct evaluation and experiments at room temperature (22 °C) or indirectly calculated from the deployed oil and water phase. The main size range of droplets as established by light / fluorescence microscopy was determined within the range of the 15% and 85% quantiles. The droplets sizes determined by cryo-SEM were determined by single measurements of about 20 randomly distributed droplets. The phase volume ratio was calculated by the equation:  $phase\ volume\ ratio = \frac{V_d}{V_c}$ , where  $V_d$  is the volume of the dispersed phase and  $V_c$  is the volume of the continuous phase. Only if the skewness was  $> 1.0$  (or  $< -1.0$ ) was it considered substantial. For excess kurtosis, a z-score was obtained by dividing the excess kurtosis by its standard error. For z-scores  $> 1.96$  (or  $< -1.96$ ), the excess kurtosis was considered substantial. Otherwise, the droplet distribution was classified as almost mesokurtic.

| emulsion                                             | generation | general appearance                | light / fluorescence microscopy                                                                                                                                             | cryo-SEM                                                                                                                                                                                                                                                                                                                                     | descriptive parameters<br>(determined by light /<br>fluorescence microscopy)                                                                                                                                                                                                                                                                                                                        | phase volume ratio (directly<br>calculated from the deployed<br>oil and water phase)       |
|------------------------------------------------------|------------|-----------------------------------|-----------------------------------------------------------------------------------------------------------------------------------------------------------------------------|----------------------------------------------------------------------------------------------------------------------------------------------------------------------------------------------------------------------------------------------------------------------------------------------------------------------------------------------|-----------------------------------------------------------------------------------------------------------------------------------------------------------------------------------------------------------------------------------------------------------------------------------------------------------------------------------------------------------------------------------------------------|--------------------------------------------------------------------------------------------|
| VG50<br>(Fig. 1 a, b)                                | 1          | solid; rubber-like;<br>not sticky | homogeneous and dense<br>distribution of droplets; main size<br>range about 5.5 - 16.3 $\mu\text{m}$ ;<br>individual droplets sizes $> 100$<br>$\mu\text{m}$ ; o/w emulsion | very dense homogeneous<br>distribution of droplets; surface of<br>outer phase of slightly rough<br>appearance; main size range of<br>droplets about 5 - 15 $\mu\text{m}$ ;<br>individual droplet sizes range<br>between $< 1 \mu\text{m}$ and $\leq 50 \mu\text{m}$ ;<br>smooth droplets surrounded by a<br>slightly textured boundary layer | 10 % percentile = 1.00 $\mu\text{m}$<br>25 % percentile = 12.21 $\mu\text{m}$<br>75 % percentile = 65.50 $\mu\text{m}$<br>90 % percentile = 102.00 $\mu\text{m}$<br>median = 22.00 $\mu\text{m}$<br>arithmetic mean = 37.68 $\mu\text{m}$<br>mode = 102.00 $\mu\text{m}$<br>standard deviation = 36.44<br>excess kurtosis = -0.70 (almost<br>mesokurtic)<br>skewness = 0.91 (almost<br>symmetrical) | oil phase volume = 30.00 ml<br>water phase volume = 29.58 ml<br>phase volume ratio = 1.014 |
| VP50<br>(Supporting<br>Information:<br>Fig. S2 a, b) | 1          | soft; elastic;<br>slightly sticky | homogeneous and dense<br>distribution of droplets; main size<br>range about 4.4 - 12.2 $\mu\text{m}$ ;<br>individual droplet sizes $\leq 27 \mu\text{m}$ ;<br>o/w emulsion  | loose homogeneous distribution of<br>droplets; surface of outer phase of<br>slightly rough appearance; main<br>size range of droplets about 2 - 10<br>$\mu\text{m}$ ; individual droplet sizes range<br>between $< 1 \mu\text{m}$ and $\leq 20 \mu\text{m}$ ;<br>smooth droplets                                                             | 10 % percentile = 1.00 $\mu\text{m}$<br>25 % percentile = 5.39 $\mu\text{m}$<br>75 % percentile = 18.25 $\mu\text{m}$<br>90 % percentile = 24.09 $\mu\text{m}$<br>median = 12.60 $\mu\text{m}$<br>arithmetic mean = 12.31 $\mu\text{m}$<br>mode = 18.25 $\mu\text{m}$<br>standard deviation = 8.26<br>excess kurtosis = -1.11<br>(platykurtic)<br>skewness = 0.06 (almost<br>symmetrical)           | oil phase volume = 30.00 ml<br>water phase volume = 30.00 ml<br>phase volume ratio = 1.00  |

| emulsion                                             | generation | general appearance                                           | light / fluorescence microscopy                                                                                                                                                                                                                                                                     | cryo-SEM                                                                                                                                                                                                                                                                                                                     | descriptive parameters<br>(determined by light /<br>fluorescence microscopy)                                                                                                                                                                                                                                                                                                              | phase volume ratio (directly<br>calculated from the deployed<br>oil and water phase)       |
|------------------------------------------------------|------------|--------------------------------------------------------------|-----------------------------------------------------------------------------------------------------------------------------------------------------------------------------------------------------------------------------------------------------------------------------------------------------|------------------------------------------------------------------------------------------------------------------------------------------------------------------------------------------------------------------------------------------------------------------------------------------------------------------------------|-------------------------------------------------------------------------------------------------------------------------------------------------------------------------------------------------------------------------------------------------------------------------------------------------------------------------------------------------------------------------------------------|--------------------------------------------------------------------------------------------|
| WG20<br>(Supporting<br>Information:<br>Fig. S2 c, d) | 1          | solid;<br>under pressure brittle;<br>not sticky              | homogeneous and loose<br>distribution of droplets; main size<br>range about 6.8 - 24.8 $\mu\text{m}$ ;<br>individual droplet size range < 1<br>$\mu\text{m}$ (below microscopic<br>resolution) and $\leq 40 \mu\text{m}$ ; sporadic<br>aggregation of droplets to larger<br>fragments; o/w emulsion | dense homogeneous distribution of<br>droplets; surface of outer phase of<br>rough and chiselled appearance;<br>main size range of droplets about 4<br>- 10 $\mu\text{m}$ ; individual droplets < 1<br>$\mu\text{m}$ in between larger droplets;<br>droplets about 50 $\mu\text{m}$ were rare;<br>droplets irregularly shaped | 10 % percentile = 0.47 $\mu\text{m}$<br>25 % percentile = 0.57 $\mu\text{m}$<br>75 % percentile = 26.62 $\mu\text{m}$<br>90 % percentile = 32.59 $\mu\text{m}$<br>median = 11.93 $\mu\text{m}$<br>arithmetic mean = 13.62 $\mu\text{m}$<br>mode = 0.52 $\mu\text{m}$<br>standard deviation = 13.64<br>excess kurtosis = -1.57<br>(platykurtic)<br>skewness = 0.30 (almost<br>symmetrical) | oil phase volume = 12.00 ml<br>water phase volume = 47.32 ml<br>phase volume ratio = 0.254 |
| WP20<br>(Supporting<br>Information:<br>Fig. S2 e, f) | 1          | solid; rubber-like;<br>under pressure brittle;<br>not sticky | homogeneous and dense<br>distribution of droplets; main size<br>range about 1.6 – 6.3 $\mu\text{m}$ ;<br>individual droplet size range<br>between < 1 $\mu\text{m}$ (below<br>microscopic resolution) and $\leq 40$<br>$\mu\text{m}$ ; o/w emulsion                                                 | dense distribution of droplets;<br>surface of outer phase of rough<br>appearance; main size range of<br>droplets about 1 – 10 $\mu\text{m}$ ;<br>individual droplet sizes range<br>between < 1 $\mu\text{m}$ and about 50 $\mu\text{m}$ ;<br>droplets round to oval-shaped                                                   | 10 % percentile = 1.00 $\mu\text{m}$<br>25 % percentile = 4.76 $\mu\text{m}$<br>75 % percentile = 15.73 $\mu\text{m}$<br>90 % percentile = 18.65 $\mu\text{m}$<br>median = 9.26 $\mu\text{m}$<br>arithmetic mean = 9.75 $\mu\text{m}$<br>mode = 18.25 $\mu\text{m}$<br>standard deviation = 6.23<br>excess kurtosis = -1.26<br>(platykurtic)<br>skewness = 0.07 (almost<br>symmetrical)   | oil phase volume = 12.00 ml<br>water phase volume = 48.00 ml<br>phase volume ratio = 0.25  |



| emulsion                                            | generation | general appearance                                                                                                         | light / fluorescence microscopy                                                                                                                                                                                                                                                                                                                                                                               | cryo-SEM                                                                                                                                                                                                                                                                                                              | descriptive parameters<br>(determined by light /<br>fluorescence microscopy)                                                                                                                                                                                                                                                                                                              | phase volume ratio (directly<br>calculated from the deployed<br>oil and water phase)                         |
|-----------------------------------------------------|------------|----------------------------------------------------------------------------------------------------------------------------|---------------------------------------------------------------------------------------------------------------------------------------------------------------------------------------------------------------------------------------------------------------------------------------------------------------------------------------------------------------------------------------------------------------|-----------------------------------------------------------------------------------------------------------------------------------------------------------------------------------------------------------------------------------------------------------------------------------------------------------------------|-------------------------------------------------------------------------------------------------------------------------------------------------------------------------------------------------------------------------------------------------------------------------------------------------------------------------------------------------------------------------------------------|--------------------------------------------------------------------------------------------------------------|
| SA2<br>(Supporting<br>Information:<br>Fig. S2 g, h) | 2          | watery consistency;<br>unstable phases;<br>creaming of oily phase;<br>not sticky                                           | homogeneous and loose<br>distribution of droplets; main size<br>range about 2.7 - 8.0 $\mu\text{m}$ ;<br>individual droplet size range<br>between $< 1 \mu\text{m}$ (below<br>microscopic resolution) and $\leq 30$<br>$\mu\text{m}$ ; sporadic aggregation of<br>droplets to larger fragments;<br>fluorescent droplets and<br>successful dilution of outer phase<br>with water indicative of o/w<br>emulsion | widely scattered droplets; surface<br>of outer phase of smooth<br>appearance showing a lamellar<br>structure; main size range of<br>droplets about $< 1 - 2 \mu\text{m}$ ; round<br>bulges on surface might be<br>indicative of hidden larger droplets<br>of about $5 \mu\text{m}$ , droplets round to<br>oval-shaped | 10 % percentile = 1.41 $\mu\text{m}$<br>25 % percentile = 6.54 $\mu\text{m}$<br>75 % percentile = 28.51 $\mu\text{m}$<br>90 % percentile = 31.51 $\mu\text{m}$<br>median = 9.53 $\mu\text{m}$<br>arithmetic mean = 14.65 $\mu\text{m}$<br>mode = 31.51 $\mu\text{m}$<br>standard deviation = 11.02<br>excess kurtosis = -1.34<br>(platykurtic)<br>skewness = 0.50 (almost<br>symmetrical) | oil phase volume = 3.00 ml<br>water phase volume = 49.47 ml<br>phase volume ratio = $0.061 \pm$<br>$0.012^1$ |
| SG2<br>(Fig. 1 c, d)                                | 2          | solid; rubber-like;<br>under pressure brittle;<br>liquefaction by warming<br>to 40 - 45 $^{\circ}\text{C}$ ;<br>not sticky | homogeneous and dense<br>distribution of droplets; main size<br>range about 2.6 - 4.5 $\mu\text{m}$ ;<br>individual droplet size $< 1 \mu\text{m}$<br>(below microscopical resolution);<br>fluorescent droplets and<br>successful dilution of outer phase<br>with water are indicative of o/w<br>emulsion                                                                                                     | homogeneously distributed<br>droplets; surface of outer phase of<br>very rough appearance with flaked<br>structure, main size range of<br>droplets about $< 1 - 5 \mu\text{m}$ ; droplets<br>round to oval-shaped                                                                                                     | 10 % percentile = 2.77 $\mu\text{m}$<br>25 % percentile = 3.45 $\mu\text{m}$<br>75 % percentile = 5.15 $\mu\text{m}$<br>90 % percentile = 5.76 $\mu\text{m}$<br>median = 4.26 $\mu\text{m}$<br>arithmetic mean = 4.26 $\mu\text{m}$<br>mode = 3.77 $\mu\text{m}$<br>standard deviation = 1.11<br>excess kurtosis = 0.32 (almost<br>mesokurtic)<br>skewness = 0.02 (almost<br>symmetrical) | oil phase volume = 3.00 ml<br>water phase volume = 49.47 ml<br>phase volume ratio = $0.061 \pm$<br>$0.012^1$ |

| emulsion                                            | generation | general appearance                                                                                                            | light / fluorescence microscopy                                                                                                                                                                                                                                                                                                                                                           | cryo-SEM                                                                                                                                                                                          | descriptive parameters<br>(determined by light /<br>fluorescence microscopy)                                                                                                                                                                                                                                                                                                                | phase volume ratio (directly<br>calculated from the deployed<br>oil and water phase)                                  |
|-----------------------------------------------------|------------|-------------------------------------------------------------------------------------------------------------------------------|-------------------------------------------------------------------------------------------------------------------------------------------------------------------------------------------------------------------------------------------------------------------------------------------------------------------------------------------------------------------------------------------|---------------------------------------------------------------------------------------------------------------------------------------------------------------------------------------------------|---------------------------------------------------------------------------------------------------------------------------------------------------------------------------------------------------------------------------------------------------------------------------------------------------------------------------------------------------------------------------------------------|-----------------------------------------------------------------------------------------------------------------------|
| OA2<br>(Fig. 1 e, f)                                | 2          | watery consistency;<br>unstable phases;<br>formation of clumps;<br>not sticky                                                 | homogeneous and loose<br>distribution of droplets; main size<br>range about 2.1 - 4.0 $\mu\text{m}$ ;<br>individual droplet sizes < 1 $\mu\text{m}$<br>(below microscopic resolution);<br>sporadic aggregation of droplets<br>to larger fragments; droplets<br>polyhedral; fluorescent droplets<br>and successful dilution of outer<br>phase with water are indicative of<br>o/w emulsion | widely scattered droplets; surface<br>of outer phase of smooth<br>appearance showing a lamellar<br>structure; main size range of<br>droplets about < 1 - 3 $\mu\text{m}$ ; droplets<br>polyhedral | 10 % percentile = 1.48 $\mu\text{m}$<br>25 % percentile = 3.27 $\mu\text{m}$<br>75 % percentile = 4.26 $\mu\text{m}$<br>90 % percentile = 4.26 $\mu\text{m}$<br>median = 3.77 $\mu\text{m}$<br>arithmetic mean = 3.48 $\mu\text{m}$<br>mode = 4.26 $\mu\text{m}$<br>standard deviation = 1.11<br>excess kurtosis = 0.79 (almost<br>mesokurtic)<br>skewness = -1.12 (neg.<br>skewness)       | oil phase volume = 2.54 ml<br>water phase volume = 49.47 ml<br>phase volume ratio = 0.051 $\pm$<br>0.012 <sup>1</sup> |
| OG2<br>(Supporting<br>Information:<br>Fig. S1 a, b) | 2          | solid;<br>rubber-like;<br>under pressure brittle;<br>liquefaction by warming<br>to 40 - 45 $^{\circ}\text{C}$ ;<br>not sticky | homogeneous and loose<br>distribution of droplets; main size<br>range about 1.9 - 3.9 $\mu\text{m}$ ;<br>individual droplet sizes < 1 $\mu\text{m}$<br>(below microscopic resolution);<br>sporadic aggregation of droplets<br>to large flakes; droplets<br>polyhedral; fluorescent droplets<br>and successful dilution of outer<br>phase with water are indicative of<br>o/w emulsion     | dense distribution of droplets;<br>outer phase flocculent; main size<br>range of droplets about 1 - 2 $\mu\text{m}$ ;<br>single droplets about 6 $\mu\text{m}$ ;<br>droplets polyhedral           | 10 % percentile = 1.60 $\mu\text{m}$<br>25 % percentile = 2.77 $\mu\text{m}$<br>75 % percentile = 4.76 $\mu\text{m}$<br>90 % percentile = 5.26 $\mu\text{m}$<br>median = 3.77 $\mu\text{m}$<br>arithmetic mean = 3.58 $\mu\text{m}$<br>mode = 4.76 $\mu\text{m}$<br>standard deviation = 1.27<br>excess kurtosis = -0.31 (almost<br>mesokurtic)<br>skewness = -0.48 (almost<br>symmetrical) | oil phase volume = 1.98 ml<br>water phase volume = 49.18 ml<br>phase volume ratio = 0.051 $\pm$<br>0.012 <sup>1</sup> |

| emulsion                                      | generation | general appearance                                                   | light / fluorescence microscopy                                                                                                                                                                                                                                                                  | cryo-SEM                                                                                                                                                                                | descriptive parameters (determined by light / fluorescence microscopy)                                                                                                                                                                                                                                                                                                         | phase volume ratio (directly calculated from the deployed oil and water phase)                                     |
|-----------------------------------------------|------------|----------------------------------------------------------------------|--------------------------------------------------------------------------------------------------------------------------------------------------------------------------------------------------------------------------------------------------------------------------------------------------|-----------------------------------------------------------------------------------------------------------------------------------------------------------------------------------------|--------------------------------------------------------------------------------------------------------------------------------------------------------------------------------------------------------------------------------------------------------------------------------------------------------------------------------------------------------------------------------|--------------------------------------------------------------------------------------------------------------------|
| SW2<br>(Supporting Information: Fig. S1 c, d) | 2          | watery consistency; not sticky                                       | very dense distribution of tiny droplets; many droplets < 1 $\mu\text{m}$ (below microscopic resolution); main size range about < 1 - 1.2 $\mu\text{m}$ ; fluorescent droplets and successful dilution of outer phase with water are indicative of o/w emulsion                                  | widely scattered droplets; surface of outer phase of smooth appearance; main size range of droplets about $\leq 1 \mu\text{m}$                                                          | 10 % percentile = 0.39 $\mu\text{m}$<br>25 % percentile = 0.43 $\mu\text{m}$<br>75 % percentile = 0.52 $\mu\text{m}$<br>90 % percentile = 1.79 $\mu\text{m}$<br>median = 0.47 $\mu\text{m}$<br>arithmetic mean = 0.77 $\mu\text{m}$<br>mode = 0.43 $\mu\text{m}$<br>standard deviation = 0.62<br>excess kurtosis = 0.36 (almost mesokurtic)<br>skewness = 1.46 (pos. skewness) | oil phase volume = 3.00 ml<br>water phase volume = 46.29 ml<br>phase volume ratio = 0.065 $\pm$ 0.013 <sup>1</sup> |
| OW2<br>(Supporting Information: Fig. S1 e, f) | 2          | watery consistency; unstable phases; formation of clumps; not sticky | very dense distribution of tiny droplets; many droplets < 1 $\mu\text{m}$ (below microscopic resolution); main size range about $\leq 1 \mu\text{m}$ , many flakes of aggregated droplets; fluorescent droplets and successful dilution of outer phase with water are indicative of o/w emulsion | droplets aggregated and mainly localized in scattered areas; surface of outer phase of smooth appearance; main size range of droplets about < 1 - 5 $\mu\text{m}$ ; droplets polyhedral | 10 % percentile = 0.41 $\mu\text{m}$<br>25 % percentile = 0.50 $\mu\text{m}$<br>75 % percentile = 0.72 $\mu\text{m}$<br>90 % percentile = 0.86 $\mu\text{m}$<br>median = 0.60 $\mu\text{m}$<br>arithmetic mean = 0.63 $\mu\text{m}$<br>mode = 0.60 $\mu\text{m}$<br>standard deviation = 0.22<br>excess kurtosis = 14.77 (leptokurtic)<br>skewness = 3.11 (pos. skewness)      | oil phase volume = 2.53 ml<br>water phase volume = 46.29 ml<br>phase volume ratio = 0.055 $\pm$ 0.013 <sup>1</sup> |

| emulsion                                      | generation | general appearance              | light / fluorescence microscopy                                                                                                                                                                                                            | cryo-SEM                                                                                                                                                                                                                                      | descriptive parameters (determined by light / fluorescence microscopy)                                                                                                                                                                                                                                                                                                         | phase volume ratio (directly calculated from the deployed oil and water phase)                         |
|-----------------------------------------------|------------|---------------------------------|--------------------------------------------------------------------------------------------------------------------------------------------------------------------------------------------------------------------------------------------|-----------------------------------------------------------------------------------------------------------------------------------------------------------------------------------------------------------------------------------------------|--------------------------------------------------------------------------------------------------------------------------------------------------------------------------------------------------------------------------------------------------------------------------------------------------------------------------------------------------------------------------------|--------------------------------------------------------------------------------------------------------|
| SA4<br>(Fig. 1 g, h)                          | 2          | oily consistency;<br>not sticky | droplets embedded in dense outer phase; main size range about 2.3 - 4.7 $\mu\text{m}$ ; no fluorescent droplets, but fluorescent outer phase; dilution with squalane impossible, but dilution with water possible; presumably w/o emulsion | homogeneous distribution of droplets; surface of outer phase of smooth appearance; main size range of droplets about 1 - 4 $\mu\text{m}$ ; outer phase carpeted with round cavities of size range of < 1 - 2 $\mu\text{m}$ ; droplets round   | 10 % percentile = 2.77 $\mu\text{m}$<br>25 % percentile = 3.77 $\mu\text{m}$<br>75 % percentile = 5.76 $\mu\text{m}$<br>90 % percentile = 6.85 $\mu\text{m}$<br>median = 4.76 $\mu\text{m}$<br>arithmetic mean = 4.74 $\mu\text{m}$<br>mode = 4.76 $\mu\text{m}$<br>standard deviation = 1.77<br>excess kurtosis = 1.63 (leptokurtic)<br>skewness = 0.77 (almost symmetrical)  | oil phase volume = 38.77 ml<br>water phase volume = 19.34 ml<br>phase volume ratio = $0.50 \pm 0.34^1$ |
| SG4<br>(Supporting Information: Fig. S1 g, h) | 2          | oily consistency;<br>not sticky | droplets embedded in dense outer phase; main size range about 2.3 - 3.5 $\mu\text{m}$ ; no fluorescent droplets, but fluorescent outer phase; dilution with both squalane and water impossible; presumably w/o emulsion                    | homogeneous distribution of droplets; surface of outer phase of smooth appearance; main size range of droplets about < 1 - 2 $\mu\text{m}$ ; outer phase carpeted with round cavities of size range of < 1 - 2 $\mu\text{m}$ ; droplets round | 10 % percentile = 2.28 $\mu\text{m}$<br>25 % percentile = 2.77 $\mu\text{m}$<br>75 % percentile = 3.77 $\mu\text{m}$<br>90 % percentile = 5.76 $\mu\text{m}$<br>median = 3.27 $\mu\text{m}$<br>arithmetic mean = 3.57 $\mu\text{m}$<br>mode = 2.77 $\mu\text{m}$<br>standard deviation = 1.03<br>excess kurtosis = 0.21 (almost mesokurtic)<br>skewness = 1.00 (pos. skewness) | oil phase volume = 38.77 ml<br>water phase volume = 19.34 ml<br>phase volume ratio = $0.50 \pm 0.34^1$ |

<sup>1</sup>The standard deviation of the phase volume ratio represents the three possible distributions of the non-ionic surfactant Span 80: (1) Span 80 fully dissolves in the hydrophilic fraction, (2) Span 80 fully dissolves in the hydrophobic fraction or (3) the fatty acid section of Span 80 dissolves in the hydrophobic fraction, whereas the sorbitan section dissolves in the hydrophilic fraction. With regard to the structure of the non-ionic surfactant Span 80, about 66% of the molecule consists of the fatty acid oleat (Supporting Information: Tab. S16), which can be credited to the hydrophobic phase, whereas the remaining 34% belongs to the hydrophilic phase.

**Table S2:** Arithmetic means  $\pm$  standard deviations of both the adhesion and the friction values for each emulsion as determined in the tribological measurements. The measured values refer to the surface area of the silicon wafer of 6.45 mm<sup>2</sup>. N describes the number of measurements of one emulsion. After each measurement, the applied emulsion was renewed.

| emulsion | adhesion [mN]            | friction [mN]            |                          |                          |
|----------|--------------------------|--------------------------|--------------------------|--------------------------|
|          |                          | 50 $\mu$ m/s             | 200 $\mu$ m/s            | 500 $\mu$ m/s            |
| VG50     | 31.02 $\pm$ 15.6<br>N=10 | 21.60 $\pm$ 10.4<br>N=11 | 39.17 $\pm$ 11.6<br>N=11 | 32.12 $\pm$ 10.3<br>N=10 |
| VP50     | 93.41 $\pm$ 37.6<br>N=9  | 5.25 $\pm$ 2.8<br>N=10   | 13.93 $\pm$ 8.0<br>N=16  | 19.37 $\pm$ 6.5<br>N=10  |
| WG20     | 51.18 $\pm$ 17.9<br>N=10 | 39.14 $\pm$ 8.9<br>N=9   | 28.90 $\pm$ 6.9<br>N=11  | 18.07 $\pm$ 3.7<br>N=10  |
| WP20     | 57.12 $\pm$ 27.6<br>N=12 | 3.73 $\pm$ 1.1<br>N=10   | 11.36 $\pm$ 7.5<br>N=10  | 20.25 $\pm$ 4.7<br>N=10  |
| SA2      | 0.93 $\pm$ 0.8<br>N=9    | 0.27 $\pm$ 0.1<br>N=10   | 0.38 $\pm$ 0.2<br>N=9    | 0.40 $\pm$ 0.1<br>N=8    |
| SG2      | 15.49 $\pm$ 9.5<br>N=10  | 4.00 $\pm$ 1.3<br>N=7    | 2.68 $\pm$ 0.3<br>N=7    | 5.71 $\pm$ 1.3<br>N=7    |
| OA2      | 1.06 $\pm$ 1.0<br>N=6    | 0.17 $\pm$ 0.1<br>N=7    | 0.15 $\pm$ 0.1<br>N=10   | 0.17 $\pm$ 0.1<br>N=10   |
| OG2      | 12.90 $\pm$ 8.1<br>N=10  | 1.76 $\pm$ 1.1<br>N=9    | 1.03 $\pm$ 0.5<br>N=10   | 1.00 $\pm$ 0.8<br>N=9    |
| SW2      | 1.34 $\pm$ 1.4<br>N=10   | 0.13 $\pm$ 0.1<br>N=10   | 0.22 $\pm$ 0.1<br>N=9    | 0.21 $\pm$ 0.2<br>N=7    |
| OW2      | 1.03 $\pm$ 1.0<br>N=10   | 0.07 $\pm$ 0.0<br>N=8    | 0.07 $\pm$ 0.0<br>N=8    | 0.08 $\pm$ 0.0<br>N=8    |
| SA4      | 17.63 $\pm$ 8.8<br>N=10  | 0.21 $\pm$ 0.2<br>N=8    | 0.42 $\pm$ 0.3<br>N=9    | 0.46 $\pm$ 0.4<br>N=9    |
| SG4      | 15.42 $\pm$ 5.3<br>N=10  | 0.20 $\pm$ 0.1<br>N=10   | 0.33 $\pm$ 0.1<br>N=10   | 0.32 $\pm$ 0.1<br>N=10   |
| water    | 1.26 $\pm$ 0.8<br>N=9    | 0.14 $\pm$ 0.1<br>N=9    | 0.24 $\pm$ 0.1<br>N=9    | 0.24 $\pm$ 0.1<br>N=8    |
| squalane | 3.04 $\pm$ 2.1<br>N=10   | 0.61 $\pm$ 0.4<br>N=11   | 1.16 $\pm$ 0.5<br>N=10   | 1.19 $\pm$ 0.6<br>N=10   |
| glass    | 0                        | 0.16 $\pm$ 0.2<br>N=5    | 0.08 $\pm$ 0.0<br>N=6    | 0.12 $\pm$ 0.1<br>N=5    |

**Table S3:** Listing of all significant pairwise comparisons of the logarithmized adhesion of the emulsions of the first generation. The results of pairwise comparisons that are not listed are not significant. Statistical analyses: Kruskal-Wallis ANOVA followed by Kruskal-Wallis post hoc multiple comparisons.

| compared emulsions | test statistics | standardized test statistics | statistical significance |
|--------------------|-----------------|------------------------------|--------------------------|
| water – WG20       | 24.4            | 3.6                          | ***                      |
| water – WP20       | 25.7            | 4.0                          | ***                      |
| water – VP50       | 36.2            | 5.3                          | ***                      |
| VG50 – VP50        | -21.5           | -3.2                         | **                       |
| water – VG50       | 14.7            | 2.2                          | *                        |

**Table S4:** Listing of all significant pairwise comparisons of the logarithmized adhesion of the emulsions of the second generation. The results of all pairwise comparisons that are not listed are not significant. Statistical analyses: Kruskal-Wallis ANOVA followed by Kruskal-Wallis post hoc multiple comparisons.

| compared emulsions | test statistics | standardized test statistics | statistical significance |
|--------------------|-----------------|------------------------------|--------------------------|
| SA2-OG2            | -46.2           | -3.6                         | ***                      |
| SA2-SG2            | -49.4           | -3.9                         | ***                      |
| SA2-SG4            | -51.5           | -4.0                         | ***                      |
| SA2-SA4            | -53.4           | -4.2                         | ***                      |
| OW2-OG2            | 44.2            | 3.7                          | ***                      |
| OW2-SG2            | 47.4            | 3.9                          | ***                      |
| OW2-SG4            | -49.5           | -4.1                         | ***                      |
| OW2-SA4            | -51.4           | -4.3                         | ***                      |
| OA2-SA4            | -49.4           | -3.6                         | ***                      |
| water-SG2          | 43.5            | 3.5                          | ***                      |
| water-SG4          | 45.6            | 3.7                          | ***                      |
| water-SA4          | 47.5            | 3.8                          | ***                      |
| OA2-SG2            | 45.4            | 3.3                          | **                       |
| OA2-SG4            | -47.5           | -3.4                         | **                       |
| water-OG2          | 40.3            | 3.3                          | **                       |
| OA2-OG2            | -42.2           | -3.0                         | **                       |
| squalane-SA4       | 34.7            | 2.9                          | **                       |
| squalane-SG4       | 32.8            | 2.7                          | **                       |
| squalane-SG2       | 30.7            | 2.5                          | *                        |
| squalane-OG2       | 27.5            | 2.3                          | *                        |

**Table S5:** Listing of all significant pairwise comparisons of the the logarithmized friction between the emulsions of the first generation at the speed of  $50 \mu\text{m s}^{-1}$ . The results of all pairwise comparisons that are not listed are not significant. Statistical analyses: Kruskal-Wallis ANOVA followed by Kruskal-Wallis post hoc multiple comparisons.

| compared emulsions | test statistics | standardized test statistics | statistical significance |
|--------------------|-----------------|------------------------------|--------------------------|
| glass-VG50         | 34.8            | 4.0                          | ***                      |
| glass-WG20         | 43.3            | 5.0                          | ***                      |
| water-VG50         | 32.5            | 4.5                          | ***                      |
| water-WG20         | 41.0            | 5.6                          | ***                      |
| WP20-WG20          | 26.0            | 3.6                          | ***                      |
| VP50-WG20          | -23.3           | -3.2                         | **                       |
| WP20-VG50          | 17.5            | 2.5                          | *                        |
| water-VP50         | 17.7            | 2.4                          | *                        |
| glass-VP50         | 20.0            | 2.3                          | *                        |
| VP50-VG50          | 14.8            | 2.1                          | *                        |
| water-WP20         | 15.0            | 2.0                          | *                        |
| glass-WP20         | 17.3            | 2.0                          | *                        |

**Table S6:** Listing of all significant pairwise comparisons of the logarithmized friction between the emulsions of the first generation at the speed of  $200 \mu\text{m s}^{-1}$ . The results of all pairwise comparisons that are not listed are not significant. Statistical analyses: Kruskal-Wallis ANOVA followed by Kruskal-Wallis post hoc multiple comparisons.

| compared emulsions | test statistics | standardized test statistics | statistical significance |
|--------------------|-----------------|------------------------------|--------------------------|
| glass-WG20         | 42.6            | 4.6                          | ***                      |
| glass-VG50         | 49.2            | 5.5                          | ***                      |
| water-WG20         | 35.3            | 4.2                          | ***                      |
| water-VG50         | 42.0            | 5.3                          | ***                      |
| glass-VP50         | 27.7            | 3.3                          | **                       |
| WP20-VG50          | 25.7            | 3.3                          | **                       |
| VP50-VG50          | 21.6            | 3.1                          | **                       |
| water-VP50         | 20.4            | 2.8                          | **                       |
| glass-WP20         | 23.5            | 2.6                          | *                        |
| WP20-WG20          | 19.0            | 2.3                          | *                        |
| VP50-WG20          | -14.9           | -2.0                         | *                        |
| water-WP20         | 16.3            | 2.0                          | *                        |

**Table S7:** Listing of all significant pairwise comparisons of the logarithmized friction between the emulsions of the first generation at the speed of  $500 \mu\text{m s}^{-1}$ . The results of all pairwise comparisons that are not listed are not significant. Statistical analyses: Kruskal-Wallis ANOVA followed by Kruskal-Wallis post hoc multiple comparisons.

| compared emulsions | test statistics | standardized test statistics | statistical significance |
|--------------------|-----------------|------------------------------|--------------------------|
| glass-VG50         | 41.4            | 4.8                          | ***                      |
| water-VG50         | 36.5            | 4.9                          | ***                      |
| glass-VP50         | 27.6            | 3.2                          | **                       |
| glass-WP20         | 27.9            | 3.2                          | **                       |
| water-VP50         | 22.7            | 3.1                          | **                       |
| water-WP20         | 23.0            | 3.1                          | **                       |
| glass-WG20         | 23.7            | 2.8                          | **                       |
| water-WG20         | 18.9            | 2.6                          | *                        |
| WG20-VG50          | 17.7            | 2.6                          | *                        |
| VP50-VG50          | 13.8            | 2.0                          | *                        |



**Table S8:** Listing of all significant pairwise comparisons of the logarithmized friction between the emulsions of the second generation at the speed of  $50 \mu\text{m s}^{-1}$ . The results of all pairwise comparisons that are not listed are not significant. Statistical analyses: Kruskal-Wallis ANOVA followed by Kruskal-Wallis post hoc multiple comparisons.

| compared emulsions | test statistics | standardized test statistics | statistical significance |
|--------------------|-----------------|------------------------------|--------------------------|
| OW2-squalane       | -51.9           | -4.1                         | ***                      |
| OW2-OG2            | -70.2           | -5.2                         | ***                      |
| OW2-SG2            | 77.2            | 5.4                          | ***                      |
| glass-OG2          | 59.9            | 4.1                          | ***                      |
| glass-SG2          | 67.0            | 4.4                          | ***                      |
| SW2-OG2            | -54.1           | -4.3                         | ***                      |
| SW2-SG2            | -61.2           | -4.5                         | ***                      |
| water-OG2          | 51.9            | 4.0                          | ***                      |
| water-SG2          | 59.0            | 4.2                          | ***                      |
| OA2-OG2            | -51.1           | -3.7                         | ***                      |
| OA2-SG2            | 58.1            | 4.0                          | ***                      |
| OW2-SA2            | 45.2            | 3.5                          | **                       |
| SA4-SG2            | 48.1            | 3.4                          | **                       |
| SG4-SG2            | 45.5            | 3.4                          | **                       |
| SA4-OG2            | 41.0            | 3.1                          | **                       |
| SG4-OG2            | 38.4            | 3.0                          | **                       |
| glass-squalane     | 41.7            | 3.0                          | **                       |
| SW2-squalane       | -35.9           | -3.0                         | **                       |
| water-squalane     | -33.7           | -2.7                         | **                       |
| glass-SA2          | 35.0            | 2.5                          | *                        |
| OA2-squalane       | -32.8           | -2.5                         | *                        |
| OW2-SG4            | -31.8           | -2.4                         | *                        |
| SW2-SA2            | -29.1           | -2.4                         | *                        |
| SA2-SG2            | -32.1           | -2.4                         | *                        |
| water-SA2          | 26.9            | 2.1                          | *                        |
| OW2-SA4            | -29.1           | -2.1                         | *                        |
| SA2-OG2            | -25.0           | -2.0                         | *                        |

**Table S9:** Listing of all significant pairwise comparisons of the logarithmized friction between the emulsions of the second generation at the speed of  $200 \mu\text{m s}^{-1}$ . The results of all pairwise comparisons that are not listed are not significant. Statistical analyses: Kruskal-Wallis ANOVA followed by Kruskal-Wallis post hoc multiple comparisons.

| compared emulsions | test statistics | standardized test statistics | statistical significance |
|--------------------|-----------------|------------------------------|--------------------------|
| OW2-OG2            | -65.9           | -4.9                         | ***                      |
| OW2-squalane       | -67.4           | -5.1                         | ***                      |
| OW2-SG2            | 82.1            | 6.0                          | ***                      |
| glass-OG2          | 64.9            | 4.5                          | ***                      |
| glass-squalane     | 66.4            | 4.6                          | ***                      |
| glass-SG2          | 81.2            | 5.5                          | ***                      |
| OA2-OG2            | -51.4           | -4.1                         | ***                      |
| OA2-squalane       | -52.9           | -4.2                         | ***                      |
| OA2-SG2            | 67.7            | 5.2                          | ***                      |
| SA2-SG2            | -61.9           | -4.4                         | ***                      |
| SW2-SG2            | -53.0           | -4.0                         | ***                      |
| water-SG2          | 52.1            | 4.0                          | ***                      |
| OW2-SG4            | -44.0           | -3.3                         | **                       |
| SA2-OG2            | -45.6           | -3.3                         | **                       |
| SA2-squalane       | -47.1           | -4.0                         | **                       |
| OW2-SA4            | -41.7           | -3.1                         | **                       |
| SA4-SG2            | 40.4            | 3.1                          | **                       |
| glass-SG4          | 43.0            | 3.0                          | **                       |
| SW2-squalane       | -38.2           | -3.0                         | **                       |
| SG4-SG2            | 38.2            | 3.0                          | **                       |
| water-squalane     | -37.3           | -2.9                         | **                       |
| SW2-OG2            | -36.7           | -2.8                         | **                       |
| glass-SA4          | 40.8            | 2.8                          | **                       |
| water-OG2          | 35.8            | 2.8                          | **                       |
| OA2-SG4            | -29.5           | -2.3                         | *                        |
| OW2-water          | -30.0           | -2.2                         | *                        |
| OW2-SW2            | 29.1            | 2.1                          | *                        |
| OA2-SA4            | -27.2           | -2.1                         | *                        |
| SA4-squalane       | -25.7           | -2.0                         | *                        |
| glass-water        | 29.1            | 2.0                          | *                        |

**Table S10:** Listing of all significant pairwise comparisons of the logarithmized friction between the emulsions of the second generation at the speed of  $500 \mu\text{m s}^{-1}$ . The results of all pairwise comparisons that are not listed are not significant. Statistical analyses: Kruskal-Wallis ANOVA followed by Kruskal-Wallis post hoc multiple comparisons.

| compared emulsions | test statistics | standardized test statistics | statistical significance |
|--------------------|-----------------|------------------------------|--------------------------|
| OW2-SA2            | 47.5            | 3.5                          | ***                      |
| OW2-OG2            | -60.7           | -4.6                         | ***                      |
| OW2-squalane       | -66.4           | -5.2                         | ***                      |
| OW2-SG2            | 81.4            | 6.2                          | ***                      |
| glass-squalane     | 58.0            | 3.9                          | ***                      |
| glass-SG2          | 73.0            | 4.9                          | ***                      |
| OA2-OG2            | -43.5           | -3.5                         | ***                      |
| OA2-squalane       | -49.2           | -4.1                         | ***                      |
| OA2-SG2            | 64.2            | 5.2                          | ***                      |
| SW2-squalane       | -46.7           | -3.5                         | ***                      |
| SW2-SG2            | -61.7           | -4.5                         | ***                      |
| water-SG2          | 51.5            | 3.9                          | ***                      |
| glass-OG2          | 52.3            | 3.5                          | **                       |
| SG4-SG2            | 42.3            | 3.4                          | **                       |
| SA4-SG2            | 41.6            | 3.3                          | **                       |
| OW2-SG4            | -39.1           | -3.1                         | **                       |
| OW2-SA4            | -39.8           | -3.0                         | **                       |
| SW2-OG2            | -41.1           | -3.0                         | **                       |
| water-squalane     | -36.5           | -2.9                         | **                       |
| SA2-SG2            | -33.9           | -2.6                         | *                        |
| glass-SA2          | 39.1            | 2.5                          | *                        |
| OA2-SA2            | 30.3            | 2.4                          | *                        |
| water-OG2          | 30.8            | 2.4                          | *                        |
| SG4-squalane       | -27.3           | -2.3                         | *                        |
| OW2-water          | -29.9           | -2.2                         | *                        |
| SA4-squalane       | -26.6           | -2.1                         | *                        |
| glass-SA4          | 31.4            | 2.1                          | *                        |
| glass-SG4          | 30.7            | 2.1                          | *                        |
| SW2-SA2            | -27.8           | -2.0                         | *                        |

**Table S11:** Listing of all pairwise comparisons of the logarithmized friction within the emulsions of the first generation relating to the three different velocities. Statistical analyses: Friedman test followed by by Friedman post hoc multiple comparisons. Abbreviations: n.s. = not significant.

| compared emulsions                            | test statistics | standardized test statistics | statistical significance |
|-----------------------------------------------|-----------------|------------------------------|--------------------------|
| emulsion VG50                                 |                 |                              |                          |
| VG50_50-VG50_500                              | -0.7            | -1.6                         | n.s.                     |
| VG50_50-VG50_200                              | -1.1            | -2.5                         | *                        |
| VG50_500-VG50_200                             | 0.4             | 0.9                          | n.s.                     |
| emulsion VP50                                 |                 |                              |                          |
| VP50_50-VP50_200                              | -0.9            | -2.0                         | *                        |
| VP50_50-VP50_500                              | -1.2            | -2.7                         | *                        |
| VP50_200-VP50_500                             | -0.3            | -0.7                         | n.s.                     |
| emulsion WG20                                 |                 |                              |                          |
| WG20_500-WG20_200                             | 1.1             | 2.4                          | *                        |
| WG20_500-WG20_50                              | 1.9             | 4.0                          | ***                      |
| WG20_200-WG20_50                              | 0.8             | 1.7                          | n.s.                     |
| emulsion WP20                                 |                 |                              |                          |
| WP20_50-WP20_200                              | -1.1            | -2.5                         | *                        |
| WP20_50-WP20_500                              | -1.9            | -4.3                         | ***                      |
| WP20_200-WP20_500                             | -0.8            | -1.8                         | n.s.                     |
| control water                                 |                 |                              |                          |
| no significances between the three velocities |                 |                              |                          |
| control glass                                 |                 |                              |                          |
| no significances between the three velocities |                 |                              |                          |

**Table S12:** Listing of all pairwise comparisons of the logarithmized friction within the emulsions of the second generation and the squalane control relating to the three different velocities. Statistical analyses: Friedman test followed by Friedman post hoc multiple comparisons. Abbreviations: n.s. = not significant.

| compared emulsions                            | test statistics | standardized test statistics | statistical significance |
|-----------------------------------------------|-----------------|------------------------------|--------------------------|
| emulsion SW2                                  |                 |                              |                          |
| SW2_50-SW2_500                                | -0.9            | -1.6                         | n.s.                     |
| SW2_50-SW2_200                                | -1.7            | -3.2                         | **                       |
| SW2_500-SW2_200                               | 0.9             | 1.6                          | n.s.                     |
| emulsion OW2                                  |                 |                              |                          |
| no significances between the three velocities |                 |                              |                          |
| emulsion SA2                                  |                 |                              |                          |
| no significances between the three velocities |                 |                              |                          |
| emulsion SG2                                  |                 |                              |                          |
| SG2_200-SG2_50                                | 0.9             | 1.6                          | n.s.                     |
| SG2_200-SG2_500                               | -1.7            | -3.2                         | **                       |
| SG2_50-SG2_500                                | -0.9            | -1.6                         | n.s.                     |
| emulsion OA2                                  |                 |                              |                          |
| no significances between the three velocities |                 |                              |                          |
| emulsion OG2                                  |                 |                              |                          |
| OG2_500-OG2_200                               | 0.4             | 0.9                          | n.s.                     |
| OG2_500-OG2_50                                | 1.2             | 2.6                          | *                        |
| OG2_200-OG2_50                                | 0.8             | 1.7                          | n.s.                     |
| emulsion SA4                                  |                 |                              |                          |
| no significances between the three velocities |                 |                              |                          |
| emulsion SG4                                  |                 |                              |                          |
| SG4_50-SG4_500                                | -1.0            | -2.2                         | *                        |
| SG4_50-SG4_200                                | -1.7            | -3.8                         | ***                      |
| SG4_500-SG4_200                               | 0.7             | 1.6                          | n.s.                     |
| control squalane                              |                 |                              |                          |
| squalane_50-squalane_200                      | -1.3            | -2.9                         | **                       |
| squalane_50-squalane_500                      | -1.4            | -3.1                         | **                       |
| squalane_200-squalane_500                     | -0.1            | -0.2                         | n.s.                     |
| control water                                 |                 |                              |                          |
| no significances between the three velocities |                 |                              |                          |
| control glass                                 |                 |                              |                          |
| no significances between the three velocities |                 |                              |                          |

**Table S13:** Listing of all significant correlations (Pearson) between logarithmized structural and chemical parameters.

|            |                          | phase volume ratio | 10% quantile | 25% quantile | 75% quantile | 90% quantile | arithmetic mean | median | mean/median | modus | SD   | excess kurtosis |
|------------|--------------------------|--------------------|--------------|--------------|--------------|--------------|-----------------|--------|-------------|-------|------|-----------------|
| Vaseline   | statistical significance |                    |              | *            | *            | *            | *               | *      |             | **    | *    |                 |
|            | correlation              |                    |              | 0.60         | 0.58         | 0.61         | 0.62            | 0.61   |             | 0.68  | 0.65 |                 |
| squalane   | statistical significance | (*) (0.09)         |              |              |              |              |                 |        |             |       |      |                 |
|            | correlation              | 0.47               |              |              |              |              |                 |        |             |       |      |                 |
| octacosane | statistical significance |                    |              |              |              |              |                 |        |             |       |      | *               |
|            | correlation              |                    |              |              |              |              |                 |        |             |       |      | 0.56            |
| glycerine  | statistical significance |                    |              |              | *            | *            | *               | *      |             |       | **   |                 |
|            | correlation              |                    |              |              | 0.62         | 0.64         | 0.61            | 0.57   |             |       | 0.72 |                 |
| SDS        | statistical significance |                    |              | *            | **           | **           | **              | **     |             | **    | **   |                 |
|            | correlation              |                    |              | 0.59         | 0.73         | 0.76         | 0.75            | 0.76   |             | 0.69  | 0.80 |                 |
| Span 80    | statistical significance | **                 | **           |              |              |              |                 |        |             |       |      |                 |
|            | correlation              | 0.68               | 0.69         |              |              |              |                 |        |             |       |      |                 |
| AOT        | statistical significance | **                 | *            |              |              |              |                 |        |             |       |      |                 |
|            | correlation              | 0.82               | 0.58         |              |              |              |                 |        |             |       |      |                 |
| water      | statistical significance |                    |              |              |              |              |                 |        | (*) (0.07)  |       |      |                 |
|            | correlation              |                    |              |              |              |              |                 |        | 0.50        |       |      |                 |

**Table S14:** Listing of all significant correlations (Pearson) between logarithmized structural and tribological parameters.

|                  |                          | phase volume ratio | 25% quantile | 75% quantile | 90% quantile | arithmic mean | median | modus      | SD   | excess kurtosis |
|------------------|--------------------------|--------------------|--------------|--------------|--------------|---------------|--------|------------|------|-----------------|
| adhesion         | statistical significance | (*) (0.01)         |              | *            | *            | *             | **     |            | *    | (*) (0.07)      |
|                  | correlation              | 0.46               |              | 0.61         | 0.63         | 0.63          | 0.71   |            | 0.56 | -0.50           |
| friction 50µm/s  | statistical significance |                    |              | **           | **           | **            | **     |            | **   | *               |
|                  | correlation              |                    |              | 0.73         | 0.74         | 0.73          | 0.74   |            | 0.77 | -0.56           |
| friction 200µm/s | statistical significance |                    |              | **           | **           | **            | **     | (*) (0.05) | **   | *               |
|                  | correlation              |                    |              | 0.77         | 0.78         | 0.77          | 0.78   | 0.53       | 0.82 | -0.59           |
| friction 500µm/s | statistical significance |                    | (*) (0.08)   | **           | **           | **            | **     | *          | **   | *               |
|                  | correlation              |                    | 0.48         | 0.74         | 0.75         | 0.75          | 0.77   | 0.56       | 0.77 | -0.58           |

**Table S15:** Listing of all significant correlations (Pearson) between logarithmized tribological and chemical parameters.

|                  |                          | Vaseline   | microcrystalline wax | poly(vinyl alcohol) | gelatin    | glycerine | SDS  | Span 80    |
|------------------|--------------------------|------------|----------------------|---------------------|------------|-----------|------|------------|
| adhesion         | statistical significance | (*) (0.06) | (*) (0.06)           | *                   | (*) (0.09) |           | **   |            |
|                  | Correlation              | 0.51       | 0.51                 | 0.59                | 0.47       |           | 0.68 |            |
| friction 50µm/s  | statistical significance | (*) (0.06) | *                    |                     | **         | **        | **   | (*) (0.07) |
|                  | correlation              | 0.52       | 0.57                 |                     | 0.72       | 0.85      | 0.73 | -0.50      |
| friction 200µm/s | statistical significance | *          | *                    |                     | (*) (0.06) | **        | **   | *          |
|                  | correlation              | 0.65       | 0.57                 |                     | 0.52       | 0.75      | 0.86 | -0.54      |
| friction 500µm/s | statistical significance | *          | *                    | *                   | (*) (0.10) | *         | **   | *          |
|                  | correlation              | 0.65       | 0.56                 | 0.57                | 0.46       | 0.62      | 0.85 | -0.54      |

**Table S16:** Densities of used compounds for calculation of the volumes of both hydrophilic and hydrophobic phases.

| <b>compound</b>             | <b>density [g/ml]</b>                                                       |
|-----------------------------|-----------------------------------------------------------------------------|
| glycerin                    | 1.249 (25°C) Sigma Aldrich                                                  |
| squalane                    | 0.81                                                                        |
| sorbitanmonooleat (Span 80) | 0.99 (molecular mass: 428.26 g/mol; molecular mass of oleat = 281.46 g/mol) |
| Vaseline (petrolatum)       | 1                                                                           |
| microcrystalline wax        | 1                                                                           |
| ocatacosane                 | 1                                                                           |
| albumin                     | 1                                                                           |
| gelatin                     | 1                                                                           |
| H <sub>2</sub> O            | 1                                                                           |
